# Supplementary material for: Treatment outcomes in the inpatient management of severe functional neurological disorder: a retrospective cohort study
Source: PubMed Central journal article supplement — BMJ Neurol Open. 2024 Jul 2;6(2):e000675. doi: 10.1136/bmjno-2024-000675 (PMC11227748; doi:10.1136/bmjno-2024-000675), 2024-07-02
Supplement: bmjno-2024-000675supp001.pdf [file bmjno-2024-000675supp001.pdf]

Supplemental Material

S-TABLE 1: DEFINITION AND EXTRACTION OF VARIABLES

| Variable                                    | How Defined                                                                                                                                                                                                                          | Extraction Method                                                                                                                                                                                                                             |
|---------------------------------------------|--------------------------------------------------------------------------------------------------------------------------------------------------------------------------------------------------------------------------------------|-----------------------------------------------------------------------------------------------------------------------------------------------------------------------------------------------------------------------------------------------|
| Age                                         | Age in years at admission                                                                                                                                                                                                            | Automated CRIS Search                                                                                                                                                                                                                         |
| Gender                                      | As recorded in Electronic Medical Record                                                                                                                                                                                             | Automated CRIS search                                                                                                                                                                                                                         |
| Length of Admission                         | Total time from admission to discharge (in weeks). For those with a break between admissions (e.g. due to Covid-19) combined length of admissions to unit                                                                            | Automated CRIS Search, correlated with admission and discharge dates in discharge documentation.                                                                                                                                              |
| Comorbidity                                 | As per NLP algorithm                                                                                                                                                                                                                 | Automated CRIS search corroborated through reading of the clinical notes                                                                                                                                                                      |
| Level of Care on Admission                  | Assigned on Scale 1-4 with points assigned for<br>-Receiving Disability Benefits<br>-Use of Mobility Aids<br>-Receiving assistance with ADLs from Carers<br>-Receiving 24 hour care)                                                 | Manually extracted through Reading of Clinical Notes                                                                                                                                                                                          |
| Systemic Physical Symptoms                  | Patients completed IPQ-R measure at admission which asked them to indicate (Y/N) whether they had experienced Fatigue, Pain, Headaches, Sleep Disturbance, Bowel Disturbances, Nausea, Dizziness, Breathlessness since their illness | Manually Extracted from IPQ-R (self report measure)                                                                                                                                                                                           |
| Duration of symptoms (prior to admission)   | Measured in Years                                                                                                                                                                                                                    | Manually extracted through Reading of Clinical Notes                                                                                                                                                                                          |
| Anxiety                                     | STAI Scale.                                                                                                                                                                                                                          | Patient reported written measure                                                                                                                                                                                                              |
| Depression                                  | BDI-II.                                                                                                                                                                                                                              | Patient reported written measure                                                                                                                                                                                                              |
| Self Rated Global Functioning               | EQ-5D-5L score<br>EQ-VAS.                                                                                                                                                                                                            | Patient reported written measure                                                                                                                                                                                                              |
| Overall Improvement/Primary outcome measure | CGI-I                                                                                                                                                                                                                                | Assigned by consultant following treatment.                                                                                                                                                                                                   |
| Abuse History                               | No abuse=0, Sexual Abuse=1, Physical Abuse=2, Other Abuse=3                                                                                                                                                                          | Manually extracted from Reading of Clinical Notes (Psychology and ward round records)                                                                                                                                                         |
| 1 year Significant life event               | Significant life event in the year prior to admission                                                                                                                                                                                | Manually extracted from Reading of Clinical Notes (Psychology and ward round records)                                                                                                                                                         |
| Depersonalisation phenomena                 | Cambridge depersonalisation scale                                                                                                                                                                                                    | Patient reported written measure                                                                                                                                                                                                              |
| Physical functioning                        | Functional Mobility Scale                                                                                                                                                                                                            | Assigned by physiotherapist, scores augmented by other physiotherapy outcome measures (Berg Balance Scale, TUG, timed 10m walk, distance walked over 6 metres, which were systematically measured at admission and discharge where possible). |

S-TABLE 2  
COMPLETION RATES OF OUTCOME MEASURES:

|                    | Percentage Complete Admission (n=52) | Percentage Complete Discharge (n=52) |
|--------------------|--------------------------------------|--------------------------------------|
| EQ-5D-5l           | 96%                                  | 85%                                  |
| EQ-Vas             | 94%                                  | 83%                                  |
| BDI-II             | 94%                                  | 81%                                  |
| STAI               | 94%                                  | 83%                                  |
| Berg Balance       | 63%                                  | 48%                                  |
| TUG                | 56%                                  | 39%                                  |
| 10m Walk test      | 42%                                  | 34%                                  |
| 6 Minute Walk test | 11%                                  | 12%                                  |
| CDS                | 88%                                  | 79%                                  |
| IPQ                | 94%                                  | 45%                                  |

Recorded reasons for missing measures: For two patients a note has been recorded stating that administering admission measures was not thought to be therapeutic. These were both patients who were finding it difficult to settle into the ward and were discharged after relatively short admissions. In addition, 6 patients self-discharged before staff had an opportunity to administer discharge measures. Where physiotherapy measures were missing, this was generally because of the severity of symptoms and heterogeneity in patient mobility (e.g. patients restricted to bed or wheelchair were not able to take part in walking tests).

Supplementary Table 3 – correlation matrix.

|                |                               | Correlations            |     |                       |                          |           |                           |              |              |                  |                      |                       |               |              |                               |            |     |        |            |            |     |           |       |  |  |
|----------------|-------------------------------|-------------------------|-----|-----------------------|--------------------------|-----------|---------------------------|--------------|--------------|------------------|----------------------|-----------------------|---------------|--------------|-------------------------------|------------|-----|--------|------------|------------|-----|-----------|-------|--|--|
|                |                               | CGI-I                   | Age | Number of Medications | Symptom Duration (years) | Sick Role | Functional Mobility Scale | IPQ Identity | IPQ Timeline | IPQ Consequences | IPQ Personal Control | IPQ Treatment Control | IPQ Coherence | IPQ Cyclical | IPQ Emotional Representations | IPQ Causes | CDS | BDI-II | STAI State | STAI Trait | BMI | EQS-SD-QL | EQVAS |  |  |
| Spearman's rho | CGI-I                         | Correlation Coefficient |     |                       |                          |           |                           |              |              |                  |                      |                       |               |              |                               |            |     |        |            |            |     |           |       |  |  |
|                |                               | Sig. (2-tailed)         |     |                       |                          |           |                           |              |              |                  |                      |                       |               |              |                               |            |     |        |            |            |     |           |       |  |  |
|                | Age                           | Correlation Coefficient |     |                       |                          |           |                           |              |              |                  |                      |                       |               |              |                               |            |     |        |            |            |     |           |       |  |  |
|                |                               | Sig. (2-tailed)         |     |                       |                          |           |                           |              |              |                  |                      |                       |               |              |                               |            |     |        |            |            |     |           |       |  |  |
|                | Number of Medications         | Correlation Coefficient |     |                       |                          |           |                           |              |              |                  |                      |                       |               |              |                               |            |     |        |            |            |     |           |       |  |  |
|                |                               | Sig. (2-tailed)         |     |                       |                          |           |                           |              |              |                  |                      |                       |               |              |                               |            |     |        |            |            |     |           |       |  |  |
|                | Symptom Duration (years)      | Correlation Coefficient |     |                       |                          |           |                           |              |              |                  |                      |                       |               |              |                               |            |     |        |            |            |     |           |       |  |  |
|                |                               | Sig. (2-tailed)         |     |                       |                          |           |                           |              |              |                  |                      |                       |               |              |                               |            |     |        |            |            |     |           |       |  |  |
|                | Sick Role                     | Correlation Coefficient |     |                       |                          |           |                           |              |              |                  |                      |                       |               |              |                               |            |     |        |            |            |     |           |       |  |  |
|                |                               | Sig. (2-tailed)         |     |                       |                          |           |                           |              |              |                  |                      |                       |               |              |                               |            |     |        |            |            |     |           |       |  |  |
|                | Functional Mobility Scale     | Correlation Coefficient |     |                       |                          |           |                           |              |              |                  |                      |                       |               |              |                               |            |     |        |            |            |     |           |       |  |  |
|                |                               | Sig. (2-tailed)         |     |                       |                          |           |                           |              |              |                  |                      |                       |               |              |                               |            |     |        |            |            |     |           |       |  |  |
|                | IPQ Identity                  | Correlation Coefficient |     |                       |                          |           |                           |              |              |                  |                      |                       |               |              |                               |            |     |        |            |            |     |           |       |  |  |
|                |                               | Sig. (2-tailed)         |     |                       |                          |           |                           |              |              |                  |                      |                       |               |              |                               |            |     |        |            |            |     |           |       |  |  |
|                | IPQ Timeline                  | Correlation Coefficient |     |                       |                          |           |                           |              |              |                  |                      |                       |               |              |                               |            |     |        |            |            |     |           |       |  |  |
|                |                               | Sig. (2-tailed)         |     |                       |                          |           |                           |              |              |                  |                      |                       |               |              |                               |            |     |        |            |            |     |           |       |  |  |
|                | IPQ Consequences              | Correlation Coefficient |     |                       |                          |           |                           |              |              |                  |                      |                       |               |              |                               |            |     |        |            |            |     |           |       |  |  |
|                |                               | Sig. (2-tailed)         |     |                       |                          |           |                           |              |              |                  |                      |                       |               |              |                               |            |     |        |            |            |     |           |       |  |  |
|                | IPQ Personal Control          | Correlation Coefficient |     |                       |                          |           |                           |              |              |                  |                      |                       |               |              |                               |            |     |        |            |            |     |           |       |  |  |
|                |                               | Sig. (2-tailed)         |     |                       |                          |           |                           |              |              |                  |                      |                       |               |              |                               |            |     |        |            |            |     |           |       |  |  |
|                | IPQ Treatment Control         | Correlation Coefficient |     |                       |                          |           |                           |              |              |                  |                      |                       |               |              |                               |            |     |        |            |            |     |           |       |  |  |
|                |                               | Sig. (2-tailed)         |     |                       |                          |           |                           |              |              |                  |                      |                       |               |              |                               |            |     |        |            |            |     |           |       |  |  |
|                | IPQ Coherence                 | Correlation Coefficient |     |                       |                          |           |                           |              |              |                  |                      |                       |               |              |                               |            |     |        |            |            |     |           |       |  |  |
|                |                               | Sig. (2-tailed)         |     |                       |                          |           |                           |              |              |                  |                      |                       |               |              |                               |            |     |        |            |            |     |           |       |  |  |
|                | IPQ Cyclical                  | Correlation Coefficient |     |                       |                          |           |                           |              |              |                  |                      |                       |               |              |                               |            |     |        |            |            |     |           |       |  |  |
|                |                               | Sig. (2-tailed)         |     |                       |                          |           |                           |              |              |                  |                      |                       |               |              |                               |            |     |        |            |            |     |           |       |  |  |
|                | IPQ Emotional Representations | Correlation Coefficient |     |                       |                          |           |                           |              |              |                  |                      |                       |               |              |                               |            |     |        |            |            |     |           |       |  |  |
|                |                               | Sig. (2-tailed)         |     |                       |                          |           |                           |              |              |                  |                      |                       |               |              |                               |            |     |        |            |            |     |           |       |  |  |
|                | IPQ Causes                    | Correlation Coefficient |     |                       |                          |           |                           |              |              |                  |                      |                       |               |              |                               |            |     |        |            |            |     |           |       |  |  |
|                |                               | Sig. (2-tailed)         |     |                       |                          |           |                           |              |              |                  |                      |                       |               |              |                               |            |     |        |            |            |     |           |       |  |  |
|                | CDS                           | Correlation Coefficient |     |                       |                          |           |                           |              |              |                  |                      |                       |               |              |                               |            |     |        |            |            |     |           |       |  |  |
|                |                               | Sig. (2-tailed)         |     |                       |                          |           |                           |              |              |                  |                      |                       |               |              |                               |            |     |        |            |            |     |           |       |  |  |
|                | BDI-II                        | Correlation Coefficient |     |                       |                          |           |                           |              |              |                  |                      |                       |               |              |                               |            |     |        |            |            |     |           |       |  |  |
|                |                               | Sig. (2-tailed)         |     |                       |                          |           |                           |              |              |                  |                      |                       |               |              |                               |            |     |        |            |            |     |           |       |  |  |
|                | STAI State                    | Correlation Coefficient |     |                       |                          |           |                           |              |              |                  |                      |                       |               |              |                               |            |     |        |            |            |     |           |       |  |  |
|                |                               | Sig. (2-tailed)         |     |                       |                          |           |                           |              |              |                  |                      |                       |               |              |                               |            |     |        |            |            |     |           |       |  |  |
|                | STAI Trait                    | Correlation Coefficient |     |                       |                          |           |                           |              |              |                  |                      |                       |               |              |                               |            |     |        |            |            |     |           |       |  |  |
|                |                               | Sig. (2-tailed)         |     |                       |                          |           |                           |              |              |                  |                      |                       |               |              |                               |            |     |        |            |            |     |           |       |  |  |
|                | BMI                           | Correlation Coefficient |     |                       |                          |           |                           |              |              |                  |                      |                       |               |              |                               |            |     |        |            |            |     |           |       |  |  |
|                |                               | Sig. (2-tailed)         |     |                       |                          |           |                           |              |              |                  |                      |                       |               |              |                               |            |     |        |            |            |     |           |       |  |  |
|                | EQS-SD-QL                     | Correlation Coefficient |     |                       |                          |           |                           |              |              |                  |                      |                       |               |              |                               |            |     |        |            |            |     |           |       |  |  |
|                |                               | Sig. (2-tailed)         |     |                       |                          |           |                           |              |              |                  |                      |                       |               |              |                               |            |     |        |            |            |     |           |       |  |  |
|                | EQVAS                         | Correlation Coefficient |     |                       |                          |           |                           |              |              |                  |                      |                       |               |              |                               |            |     |        |            |            |     |           |       |  |  |
|                |                               | Sig. (2-tailed)         |     |                       |                          |           |                           |              |              |                  |                      |                       |               |              |                               |            |     |        |            |            |     |           |       |  |  |

\*. Correlation is significant at the 0.05 level (2-tailed).  
 \*\*. Correlation is significant at the 0.01 level (2-tailed).

CGI-I: Clinical Global Impression Improvement Scale  
 IPQ: Illness Perception Questionnaire  
 CDS: Cambridge Depersonalisation Scale  
 BDI-II: Beck's Depression Index  
 STAI: Spielberger Trait Anxiety Inventory  
 BMI: Body Mass Index  
 EQS-SD-QL: EuroQol Quality of Life measure  
 EQVAS: EuroQol Visual Analogue Scale
